# Supplementary material
Source: PubMed Central journal article supplement (PMC8200889)
Supplement: 12250_2015_3614_MOESM1_ESM.pdf [file 12250_2015_3614_MOESM1_ESM.pdf]

## Electronic Supplementary Material

# Construction and characterization of infectious cDNA clones of enterovirus 71 (EV71)

Ying-wei Ma<sup>1#</sup>, Shu-bin Hao<sup>2#</sup>, Le-le Sun<sup>1</sup>, Jing Li<sup>1</sup>, Qiao Qiao<sup>1</sup>, Feng Gao<sup>3</sup>, Li Zhao<sup>1</sup>, Xue-jie Yu<sup>1</sup>, Zhi-yu Wang<sup>1</sup>, Hong-ling Wen<sup>1✉</sup>

1. Department of Virology, School of Public Health, Shandong University, Jinan 250012, China
2. Shandong Medical Equipment Quality Supervision and Inspection Center, Jinan 250101, China
3. Shandong Linyi City People's Hospital, Linyi 276000, China

Supporting information to DOI 10.1007/s12250-015-3614-3

Table S1. Primers for the construction of the infectious cDNA clone and recombinant viruses.

| Primer name              | Sequence (5'- 3')                                                                                                  |
|--------------------------|--------------------------------------------------------------------------------------------------------------------|
| ORF107 F                 | CCC <span style="border: 1px solid black; padding: 0 2px;">AAGCTT</span> CGAGTTGCAACACCCGTACGTGCTTG                |
| ORF107 R                 | GC <span style="border: 1px solid black; padding: 0 2px;">TCTAGA</span> CCTGCTTTAGTAGGAAAGTTGTACATC                |
| 5'UTR107 F               | CCC <span style="border: 1px solid black; padding: 0 2px;">AAGCTT</span> TAATACGACTCACTATAGGGTTAAAACAGCCTGTGGGTTGC |
| 3'UTR <i>Bsp</i> 1407I F | CACCATGA <span style="border: 1px solid black; padding: 0 2px;">TGTACA</span> ACTTTCCTACT                          |
| 3'UTR52T R               | GC <span style="border: 1px solid black; padding: 0 2px;">TCTAGA</span> T(52)GCTATTCTGGTTATAACAAATTTACCCC          |
| 5'UTR1 F                 | CCC <span style="border: 1px solid black; padding: 0 2px;">AAGCTT</span> TAATACGACTCACTATAGGGTTAAAACAGCCTGTGGGTTGC |
| 5'UTR1 R                 | TGTAGACACTTGC GAACCCATGTTTAGCTGTGTTAAGGGTCAAG                                                                      |
| VP4 107 F                | CTTGACCCTTAACACAGCTAAACATGGGTTTCGCAAGTGTCTACA                                                                      |
| VP4 107 R                | CATCAAGCA <span style="border: 1px solid black; padding: 0 2px;">CGTACG</span> GGTG                                |

Note: Sequences in the boxes were restriction sites. *Hind* III, AAGCTT; *Xba* I, TCTAGA; *Bsp*1407 I, TGTACA; *Bsi* WI, CGTACG.
